# Supplementary material for: Functional Plasticity in Chromosome-Microtubule Coupling on the Evolutionary Time Scale
Source: bioRxiv or medRxiv preprint supplement (doi:10.1101/2022.02.25.481917), 2023-08-22
Supplement: Supplementary file [file media-1.pdf]

Supplementary information for

Regional centromeres protect organisms from lethal mutations

Sundar Ram Sankaranarayanan, Satyadev Polisetty, Arti Dumbrepatil, A. Arockia  
Jeyaprakash, Kaustuv Sanyal\*

Corresponding author- Kaustuv sanyal (sanyal@jncasr.ac.in)

This file contains

- Supplementary figures S1-S3 with legends,
- Supplementary tables S1-S4

# Supporting figures and tables

SankaranarayananSR\_FigS1

A

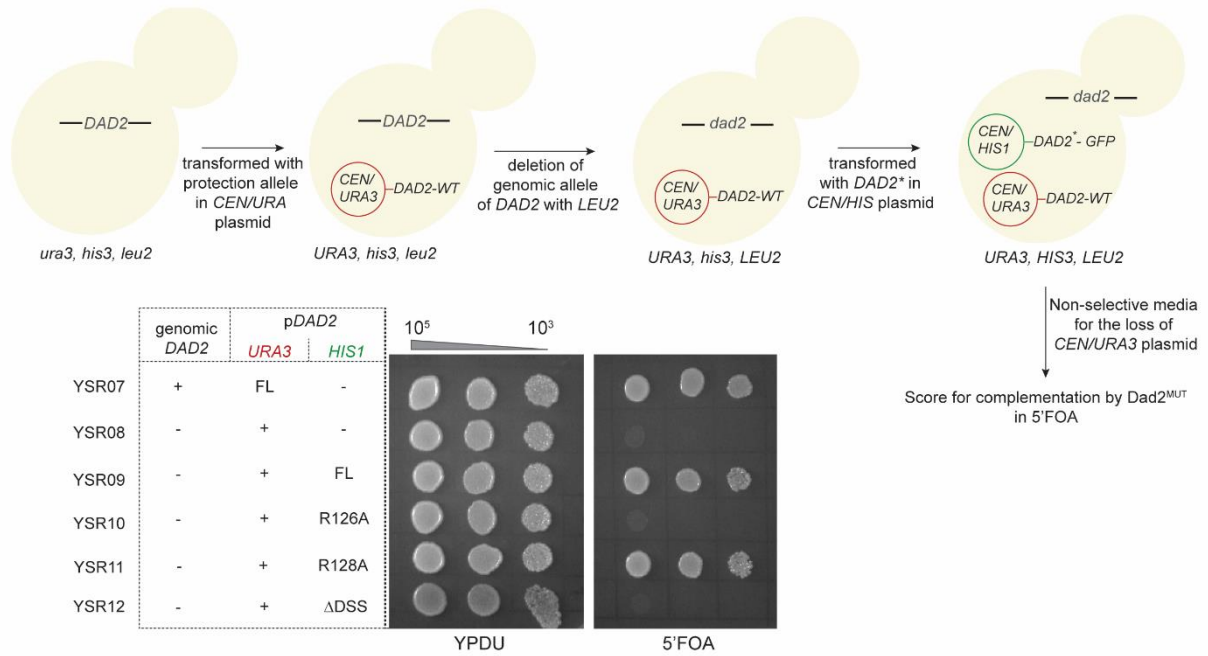

B

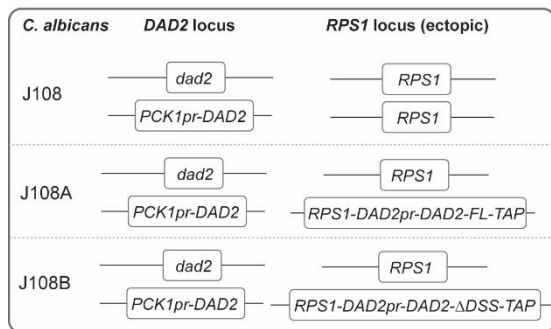

C

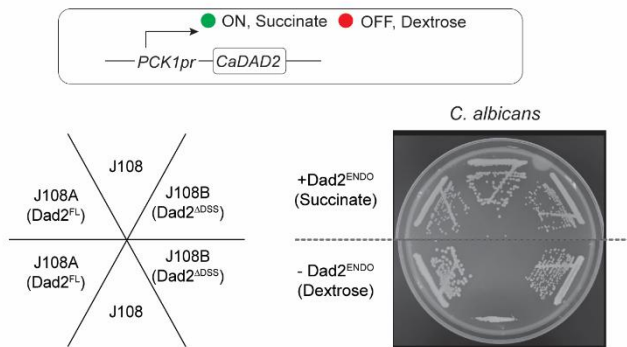

D

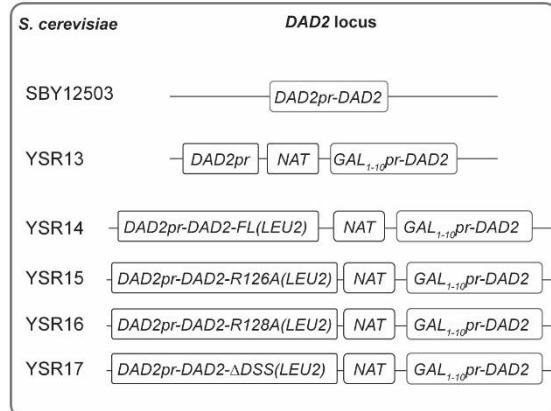

E

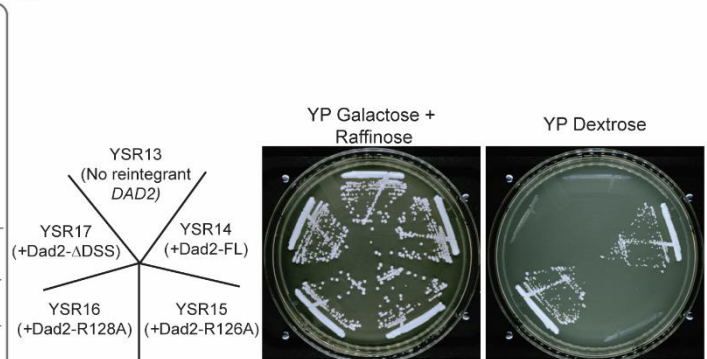

**Figure S1. Essentiality of the DSS is not conserved across point and regional centromeres.**

(A) Schematic depicting the construction of strains YSR07 through YSR12 engineered to test for essentiality of the DSS for viability of *S. cerevisiae* at 30°C. The genomic allele of *DAD2* was deleted after protecting the essential Dad2 function with ScDad2-FL from the plasmid pRS316 (*CEN/URA3*). This strain was then transformed with pRS313 (*CEN/HIS3*) containing GFP-tagged full length or the mutant versions of *DAD2* to create strains YSR09 through YSR12. These strains were grown on nonselective media for 12 h, serially diluted ten-fold ( $10^5$  to  $10^3$ ), and cells were spotted on YPDU and YPDU+5FOA plates. The plates were incubated at 30°C and imaged after 48 h. (B) The genomic locus of endogenous and ectopic *DAD2* in strains J108, J108A, and J108B engineered to test for the DSS function in *C. albicans* is depicted in a line diagram. (C) Cells from the parent strain J108 (no ectopic CaDad2) along with reintegration strains J108A (ectopic CaDad2-FL) and J108B (ectopic CaDad2- $\Delta$ DSS) were streaked on plates with media permissive or non-permissive for the *PCK1* promoter-driven expression. Plates were imaged post-incubation at 30°C for 48 h. The box above the plate photograph schematically represents the regulation of *PCK1* promoter-driven expression. (D) Line diagrams depict the genomic locus of *DAD2* in the strains SBY12503, YSR13, and the reintegration strains YSR14 through YSR17 engineered to test for the DSS function in *S. cerevisiae*. (E) Cells from the Dad2 conditional mutant (YSR13) and reintegration strains expressing indicated versions of Dad2 (YSR14 through YSR17) were streaked on plates with media permissive and non-permissive for expression of the *GAL1-10* promoter that drives the expression of endogenous Dad2. The plates were photographed after incubation at 30°C for 48 h.

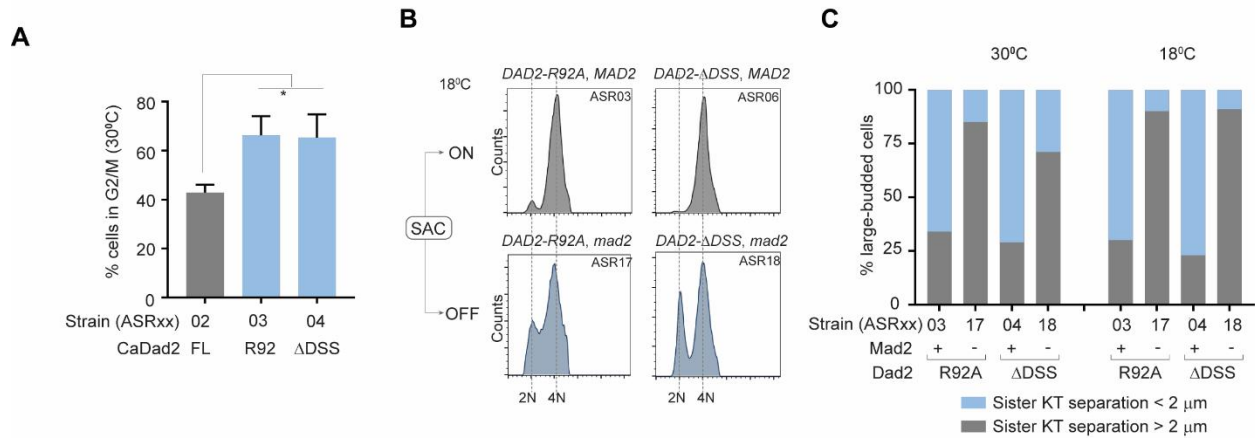

**Figure S2. The conserved DSS is essential for timely cell cycle progression in *C. albicans*.**

(A) The bar plot depicts the percentage of cells in the G2/M stage in the indicated strains grown at 30°C (from Figure 3B). The percentage of G2/M cells in each strain was estimated using the cell cycle analysis tool in the software FCS Express 7. Statistical significance was tested by one-way ANOVA ( $*p < 0.013$ ,  $N=3$ , 30000 cells per experiment). (B) Histograms depict the distribution of cells with 2N and 4N DNA content ( $x$ -axis) in the indicated strains after growth at 18°C as analyzed by flow cytometry. ON and OFF respectively indicate the ability or inability of strains to activate the spindle assembly checkpoint (SAC). (C) The percentage of large-budded cells with sister kinetochore separation less than 2 μm (blue) or greater than 2 μm (gray) in the indicated strains upon growth at 30°C and 18°C is plotted. The signs + and – in the  $x$ -axis indicate the presence or absence of *MAD2* in each strain respectively.

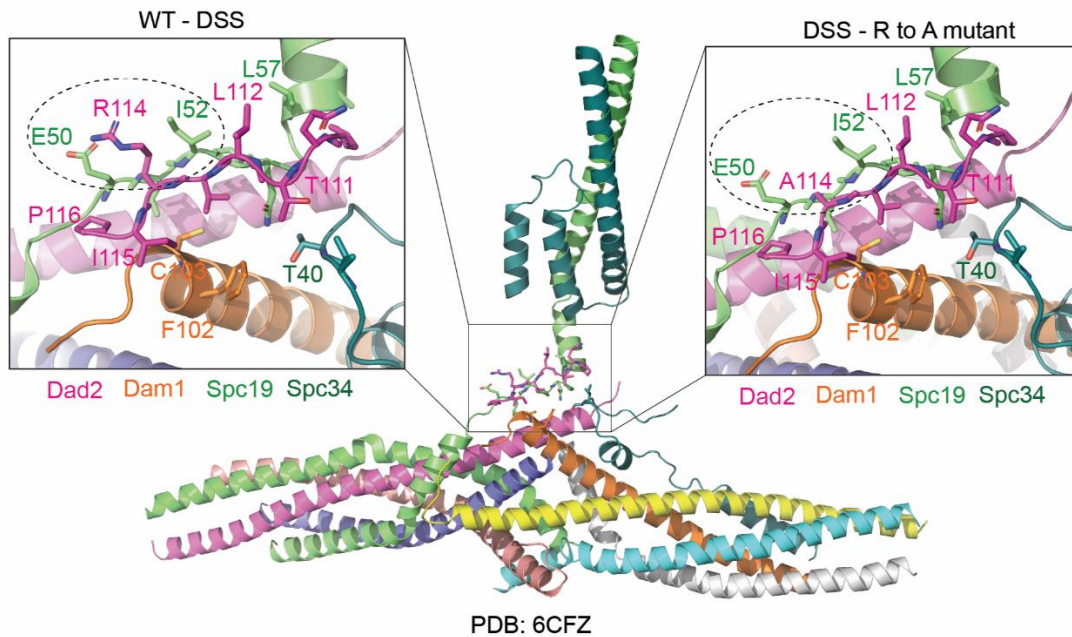

**Figure S3. Neighborhood of the DSS and the conserved arginine residue based on the known structure of the Dam1 complex (PDB 6CFZ).** The location of the DSS in the Dam1 complex monomer is highlighted in the box. The left inset represents the wild-type DSS motif. The residues making steric contacts with the conserved arginine in the DSS (R114 in *Chaetomium thermophilum* Dad2) is shown in dashed circle. The right inset represents the alanine substitution of the conserved arginine (A114) and the potential loss of interactions with the residues E50 and I52 of Spc19.

**Table S1. Distribution of point and regional centromere structures across Eukaryota.**

| Taxonomic position |                                  | Species                           | <i>CEN</i> structure | <i>CEN</i> size                            | Ref                                     |
|--------------------|----------------------------------|-----------------------------------|----------------------|--------------------------------------------|-----------------------------------------|
| Opisthokonta       | Fungi<br>(Ascomycota)            | <i>Saccharomyces cerevisiae</i>   | point                | 125 bp                                     | (Fitzgerald-Hayes et al. 1982)          |
|                    |                                  | <i>Naumovozyma castellii</i>      | point                | 125 bp                                     | (Kobayashi et al. 2015)                 |
|                    |                                  | <i>Naumovozyma dairenensis</i>    | point                | 125 bp                                     | (Kobayashi et al. 2015)                 |
|                    |                                  | <i>Saccharomyces bayanus</i>      | point                | 125 bp                                     | (Gordon et al. 2011)                    |
|                    |                                  | <i>Candida glabrata</i>           | point                | 125 bp                                     | (Gordon et al. 2011)                    |
|                    |                                  | <i>Vanderwalozyma polyspora</i>   | point                | 125 bp                                     | (Gordon et al. 2011)                    |
|                    |                                  | <i>Zygosaccharomyces rouxii</i>   | point                | 125 bp                                     | (Gordon et al. 2011)                    |
|                    |                                  | <i>Lachancea kluyveri</i>         | point                | 125 bp                                     | (Gordon et al. 2011)                    |
|                    |                                  | <i>Ashbya gossypii</i>            | point                | 125 bp                                     | (Gordon et al. 2011)                    |
|                    |                                  | <i>Kluyveromyces lactis</i>       | point                | 125 bp                                     | (Gordon et al. 2011)                    |
|                    |                                  | <i>Candida albicans</i>           | regional             | 3-5 kb                                     | (Sanyal et al. 2004)                    |
|                    |                                  | <i>Candida dubliniensis</i>       | regional             | 3-5 kb                                     | (Padmanabhan et al. 2008)               |
|                    |                                  | <i>Candida tropicalis</i>         | regional             | 10-18 kb                                   | (Chatterjee et al. 2016)                |
|                    |                                  | <i>Candida parapsilosis</i>       | regional             | 1-2.6 kb                                   | (Guin et al. 2020a; Ola et al. 2020)    |
|                    |                                  | <i>Candida viswanathii</i>        | regional             | 11-16 kb                                   | (Guin et al. 2020a)                     |
|                    |                                  | <i>Candida sojae</i>              | regional             | 7-26 kb                                    | (Guin et al. 2020a)                     |
|                    |                                  | <i>Candida auris</i>              | regional             | 2-3 kb                                     | (Narayanan et al. 2021)                 |
|                    |                                  | <i>Candida lusitaniae</i>         | regional             | 4-4.6 kb                                   | (Kapoor et al. 2015)                    |
|                    |                                  | <i>Candida haemulonii</i>         | regional             | 2-3 kb                                     | (Narayanan et al. 2021)                 |
|                    |                                  | <i>Candida duobushaemulonii</i>   | regional             | 2-3 kb                                     | (Narayanan et al. 2021)                 |
|                    |                                  | <i>Candida pseudoaemulonii</i>    | regional             | 2-3 kb                                     | (Narayanan et al. 2021)                 |
|                    |                                  | <i>Kuraishia capsulata</i>        | regional             | 3.5-6 kb                                   | (Marie-Nelly et al. 2014)               |
|                    |                                  | <i>Ogataea polymorpha</i>         | regional             | <10 kb                                     | (Ravin et al. 2013)                     |
|                    |                                  | <i>Blastobotrys adenivorans</i>   | regional             | ~6 kb                                      | (Kunze et al. 2014)                     |
|                    |                                  | <i>Yarrowia lipolytica</i>        | regional             | <200 bp                                    | (Fournier et al. 1993)                  |
|                    |                                  | <i>Komgaetaella phaffii</i>       | regional             | 3-5 kb                                     | (Coughlan et al. 2016)                  |
|                    |                                  | <i>Schefferosomyces stipites</i>  | regional             | ~10 kb                                     | (Coughlan and Wolfe 2019)               |
|                    |                                  | <i>Zymoseptoria tritici</i>       | regional             | 5-12.5 kb                                  | (Schotanus et al. 2015)                 |
|                    | <i>Neurospora crassa</i>         | regional                          | 170-300 kb           | (Cambareri et al. 1998)                    |                                         |
|                    | <i>Magnaporthe oryzae</i>        | regional                          | 57-109 kb            | (Yadav et al. 2019)                        |                                         |
|                    | <i>Schizosaccharomyces pombe</i> | regional                          | 35-110 kb            | (Nakaseko et al. 1986; Fishel et al. 1988) |                                         |
|                    | Fungi<br>(Basidiomycota)         | <i>Cryptococcus neoformans</i>    | regional             | 27-64 kb                                   | (Janbon et al. 2014; Yadav et al. 2018) |
|                    |                                  | <i>Cryptococcus deuterogattii</i> | regional             | 8-22 kb                                    | (Janbon et al. 2014; Yadav et al. 2018) |
|                    |                                  | <i>Malassezia sympodialis</i>     | regional             | 3-5.5 kb                                   | (Sankaranarayanan et al. 2020)          |
|                    |                                  | <i>Malassezia furfur</i>          | regional             | 3-5.5 kb                                   | (Sankaranarayanan et al. 2020)          |

|                                       |                           |                                 |                                |            |                                            |                        |
|---------------------------------------|---------------------------|---------------------------------|--------------------------------|------------|--------------------------------------------|------------------------|
|                                       |                           | <i>Ustilago maydis</i>          | regional                       | 7-38 kb    | (Yadav et al. 2018)                        |                        |
|                                       | Fungi (Mucoromycota)      | <i>Mucor circinelloides</i>     | mosaic of point and regional   | ~1 kb      | (Navarro-Mendoza et al. 2019)              |                        |
|                                       | Animals                   |                                 | <i>Drosophila melanogaster</i> | regional   | 200-500 kb                                 | (Sun et al. 1997)      |
|                                       |                           |                                 | <i>Equus asinus</i>            | regional   | 54-345 kb                                  | (Nergadze et al. 2018) |
|                                       |                           |                                 | <i>Gallus gallus</i>           | regional   | >30 kb                                     | (Shang et al. 2010)    |
|                                       |                           |                                 | <i>Mus musculus</i>            | regional   | 300-500 kb                                 | (Kipling et al. 1991)  |
| <i>Homo sapiens</i>                   |                           |                                 | regional                       | 0.3-5 Mb   | (Lo et al. 2001)                           |                        |
| Amoebozoa                             | Amoeba (Slime mold)       | <i>Dictyostelium discoideum</i> | regional                       | 171-361 kb | (Glockner and Heide 2009)                  |                        |
| Stramenopila-Alveolata-Rhizaria (SAR) | Stramenopiles             | <i>Phaeodactylum tricorutum</i> | regional                       | 2-5.6 kb   | (Diner et al. 2017)                        |                        |
|                                       |                           | <i>Phytophthora sojae</i>       | regional                       | 211-356 kb | (Fang et al. 2020)                         |                        |
|                                       | Alveolates                | <i>Plasmodium falciparum</i>    | regional                       | 2-2.5 kb   | (Kelly et al. 2006)                        |                        |
|                                       |                           | <i>Toxoplasma gondii</i>        | regional                       | 13-20 kb   | (Brooks et al. 2011)                       |                        |
| Archeplastida                         | Red algae                 | <i>Cyanidioschyzon merolae</i>  | regional                       | 1-4 kb     | (Kanesaki et al. 2015)                     |                        |
|                                       | Land plants (Angiosperms) | <i>Oryza sativa</i>             | regional                       | 420-820 kb | (Yan et al. 2008)                          |                        |
|                                       |                           | <i>Arabidopsis thaliana</i>     | regional                       | 40-148 kb  | (Maluszynska and Heslop-Harrison 1991)     |                        |
|                                       |                           | <i>Brassica campestris</i>      | regional                       | 20.2-10 Mb | (Harrison and Heslop-Harrison 1995)        |                        |
|                                       |                           | <i>Sorghum bicolor</i>          | regional                       | ND         | (Jiang et al. 1996)                        |                        |
|                                       |                           | <i>Triticum aestivum</i>        | regional                       | ND         | (Kishii et al. 2001)                       |                        |
|                                       |                           | <i>Zea mays</i>                 | regional                       | 2-10 Mb    | (Ananiev et al. 1998)                      |                        |
|                                       |                           | <i>Solanum tuberosum</i>        | regional                       | 1-3 Mb     | (Gong et al. 2012)                         |                        |
| Excavata                              | Kinetoplastid             | <i>Trypanosoma brucei</i>       | regional                       | 20-120 kb  | (Obado et al. 2007; Echeverry et al. 2012) |                        |

ND, not determined

**Table S2- List of strains used in this study**

| Strain                       | Parent | Genotype                                                                                                                                    |
|------------------------------|--------|---------------------------------------------------------------------------------------------------------------------------------------------|
| <i>S. cerevisiae</i> strains |        |                                                                                                                                             |
| CJY077                       |        | <i>MATa Δdad2::KanMX6 ura3-52 lys2-801 ade2-101 trp1Δ63 leu2Δ1::pCJ055(DAD2<sup>TS</sup>, LEU2) his3Δ200</i> [23]                           |
| YSR01                        | CJY077 | <i>MATa Δdad2::KanMX6 ura3-52 lys2-801 ade2-101 trp1Δ63 leu2Δ1::pCJ055 his3Δ200 pRS313G (GFP, HIS3)</i>                                     |
| YSR02                        | CJY077 | <i>MATa Δdad2::KanMX6 ura3-52 lys2-801 ade2-101 trp1Δ63 leu2Δ1::pCJ055 his3Δ200 pSR01 (DAD2-FL-GFP, HIS3,CEN6)</i>                          |
| YSR03                        | CJY077 | <i>MATa Δdad2::KanMX6 ura3-52 lys2-801 ade2-101 trp1Δ63 leu2Δ1::pCJ055 his3Δ200 pSR02 (DAD2-R126A-GFP, HIS3,CEN6)</i>                       |
| YSR04                        | CJY077 | <i>MATa Δdad2::KanMX6 ura3-52 lys2-801 ade2-101 trp1Δ63 leu2Δ1::pCJ055 his3Δ200 pSR03 (DAD2-R128A-GFP, HIS3,CEN6)</i>                       |
| YSR05                        | CJY077 | <i>MATa Δdad2::KanMX6 ura3-52 lys2-801 ade2-101 trp1Δ63 leu2Δ1::pCJ055 his3Δ200 pSR04 (DAD2-ΔDSS-GFP, HIS3,CEN6)</i>                        |
| BY4741                       |        | <i>MATa his3Δ1 leu2Δ0 met15Δ0 ura3Δ0</i>                                                                                                    |
| YSR06                        | BY4741 | <i>MATa his3Δ1 leu2Δ0 met15Δ0 ura3Δ0 SPC42::SPC42-mCherry-KanMX4</i>                                                                        |
| YSR07                        | YSR06  | <i>MATa his3Δ1 leu2Δ0 met15Δ0 ura3Δ0 SPC42::SPC42-mCherry-KanMX4 pSR05(Dad2-FL,URA3,CEN6)</i>                                               |
| YSR08                        | YSR07  | <i>MATa his3Δ1 leu2Δ0 met15Δ0 ura3Δ0 SPC42::SPC42-mCherry-KanMX4 Δdad2::LEU2 pSR05(Dad2-FL,URA3,CEN6)</i>                                   |
| YSR09                        | YSR08  | <i>MATa his3Δ1 leu2Δ0 met15Δ0 ura3Δ0 SPC42::SPC42-mCherry-KanMX4 Δdad2::LEU2 pSR05(Dad2-FL,URA3,CEN6) pSR01 (DAD2-FL-GFP, HIS3,CEN6)</i>    |
| YSR10                        | YSR08  | <i>MATa his3Δ1 leu2Δ0 met15Δ0 ura3Δ0 SPC42::SPC42-mCherry-KanMX4 Δdad2::LEU2 pSR05(Dad2-FL,URA3,CEN6) pSR02 (DAD2-R126A-GFP, HIS3,CEN6)</i> |
| YSR11                        | YSR08  | <i>MATa his3Δ1 leu2Δ0 met15Δ0 ura3Δ0 SPC42::SPC42-mCherry-KanMX4 Δdad2::LEU2 pSR05(Dad2-FL,URA3,CEN6) pSR03(DAD2-R128A-GFP, HIS3,CEN6)</i>  |
| YSR12                        | YSR08  | <i>MATa his3Δ1 leu2Δ0 met15Δ0 ura3Δ0 SPC42::SPC42-mCherry-KanMX4 Δdad2::LEU2 pSR05(Dad2-FL,URA3,CEN6) pSR04 (DAD2-ΔDSS-GFP, HIS3,CEN6)</i>  |



|                                  |          |                                                                                                                                                                             |
|----------------------------------|----------|-----------------------------------------------------------------------------------------------------------------------------------------------------------------------------|
| SBY12503                         |          | <i>MAT a pCUP1-GFP12-LacI12:HIS3 CEN3::33LacO:KanMX SPC110-mCherry:hphMX HSK3-3V5-IAA7:KanMX bar1-1 ade3Δ (UMBRIET N. et al., Nat Commun, 2014)</i>                         |
| YSR13                            | SBY12503 | <i>MAT a pCUP1-GFP12-LacI12:HIS3 CEN3::33LacO:KanMX SPC110-mCherry:hphMX HSK3-3V5-IAA7:KanMX bar1-1 ade3Δ dad2::GAL<sub>1-10</sub>prDAD2 (NAT)</i>                          |
| YSR14                            | YSR13    | <i>MAT a pCUP1-GFP12-LacI12:HIS3 CEN3::33LacO:KanMX SPC110-mCherry:hphMX HSK3-3V5-IAA7:KanMX bar1-1 ade3Δ dad2::GAL<sub>1-10</sub>prDAD2 (NAT) DAD2pr-DAD2-FL (LEU2)</i>    |
| YSR15                            | YSR13    | <i>MAT a pCUP1-GFP12-LacI12:HIS3 CEN3::33LacO:KanMX SPC110-mCherry:hphMX HSK3-3V5-IAA7:KanMX bar1-1 ade3Δ dad2::GAL<sub>1-10</sub>prDAD2 (NAT) DAD2pr-DAD2-R126A (LEU2)</i> |
| YSR16                            | YSR13    | <i>MAT a pCUP1-GFP12-LacI12:HIS3 CEN3::33LacO:KanMX SPC110-mCherry:hphMX HSK3-3V5-IAA7:KanMX bar1-1 ade3Δ dad2::GAL<sub>1-10</sub>prDAD2 (NAT) DAD2pr-DAD2-R128A (LEU2)</i> |
| YSR17                            | YSR13    | <i>MAT a pCUP1-GFP12-LacI12:HIS3 CEN3::33LacO:KanMX SPC110-mCherry:hphMX HSK3-3V5-IAA7:KanMX bar1-1 ade3Δ dad2::GAL<sub>1-10</sub>prDAD2 (NAT) DAD2pr-DAD2-ΔDSS (LEU2)</i>  |
| <b><i>C.albicans strains</i></b> |          |                                                                                                                                                                             |
| SN148                            |          | <i>Δura3::imm434/Δura3::imm434,Δhis1::hisG/Δhis1::hisG Δarg4::hisG/Δarg4::hisG, Δleu2::hisG/Δleu2::hisG (Noble and Johnson, 2005)</i>                                       |
| J108                             |          | <i>Δura3::imm434/Δura3::imm434,Δhis1::hisG/Δhis1::hisG Δarg4::hisG/Δarg4::hisG dad2::HIS1/PCK1pr-DAD2 (URA3) (Thakur and Sanyal, 2011)</i>                                  |
| J108A                            | J108     | <i>Δura3::imm434/Δura3::imm434,Δhis1::hisG/Δhis1::hisG Δarg4::hisG/Δarg4::hisG dad2::HIS1/PCK1pr-DAD2 (URA3) RPS1/RPS1:DAD2pr-DAD2<sup>FL</sup>-TAP(NAT)</i>                |
| J108B                            | J108     | <i>Δura3::imm434/Δura3::imm434,Δhis1::hisG/Δhis1::hisG Δarg4::hisG/Δarg4::hisG dad2::HIS1/PCK1pr-DAD2 (URA3) RPS1/RPS1:DAD2pr-DAD2<sup>ADSS</sup>-TAP(NAT)</i>              |
| ASR01                            | SN148    | <i>Δura3::imm434/Δura3::imm434,Δhis1::hisG/Δhis1::hisG Δarg4::hisG/Δarg4::hisG, Δleu2::hisG/Δleu2::hisG dad2::HIS1/DAD2</i>                                                 |
| ASR02<br>(CaDad2-FL)             | ASR01    | <i>Δura3::imm434/Δura3::imm434,Δhis1::hisG/Δhis1::hisG Δarg4::hisG/Δarg4::hisG, Δleu2::hisG/Δleu2::hisG dad2::HIS1/DAD2-FL-GFP(URA3)</i>                                    |
| ASR03<br>(CaDad2-R92A)           | ASR01    | <i>Δura3::imm434/Δura3::imm434,Δhis1::hisG/Δhis1::hisG Δarg4::hisG/Δarg4::hisG, Δleu2::hisG/Δleu2::hisG dad2::HIS1/DAD2-R92A-GFP(URA3)</i>                                  |

|                                         |        |                                                                                                                                                                                |
|-----------------------------------------|--------|--------------------------------------------------------------------------------------------------------------------------------------------------------------------------------|
| ASR04<br>(CaDad2-ΔDSS)                  | ASR01  | <i>Δura3::imm434/Δura3::imm434,Δhis1::hisG/Δhis1::hisG<br/>Δarg4::hisG/Δarg4::hisG, Δleu2::hisG/Δleu2::hisG<br/>dad2::HIS1/DAD2-ΔDSS-GFP(URA3)</i>                             |
| ASR07<br>(CaDad2-<br>FL,CENP-A-<br>TAP) | ASR02  | <i>Δura3::imm434/Δura3::imm434,Δhis1::hisG/Δhis1::hisG<br/>Δarg4::hisG/Δarg4::hisG, Δleu2::hisG/Δleu2::hisG<br/>dad2::HIS1/DAD2-FL-GFP(URA3) CSE4/CSE4-TAP (LEU2)</i>          |
| ASR08<br>(CaDad2-R92A,<br>CENP-A-TAP)   | ASR03  | <i>Δura3::imm434/Δura3::imm434,Δhis1::hisG/Δhis1::hisG<br/>Δarg4::hisG/Δarg4::hisG, Δleu2::hisG/Δleu2::hisG<br/>dad2::HIS1/DAD2-R92A-GFP(URA3)</i>                             |
| ASR09<br>(CaDad2-ΔDSS,<br>CENP-A-TAP)   | ASR04  | <i>Δura3::imm434/Δura3::imm434,Δhis1::hisG/Δhis1::hisG<br/>Δarg4::hisG/Δarg4::hisG, Δleu2::hisG/Δleu2::hisG<br/>dad2::HIS1/DAD2-ΔDSS-GFP(URA3) CSE4/CSE4-TAP (LEU2)</i>        |
| ASR12<br>(CaDad2-FL,<br>Tub4-mCherry)   | ASR02  | <i>Δura3::imm434/Δura3::imm434,Δhis1::hisG/Δhis1::hisG<br/>Δarg4::hisG/Δarg4::hisG, Δleu2::hisG/Δleu2::hisG<br/>dad2::HIS1/DAD2-FL-GFP(URA3) TUB4/TUB4-mCherry(NAT)</i>        |
| ASR13<br>(CaDad2-R92A,<br>Tub4-mCherry) | ASR03  | <i>Δura3::imm434/Δura3::imm434,Δhis1::hisG/Δhis1::hisG<br/>Δarg4::hisG/Δarg4::hisG, Δleu2::hisG/Δleu2::hisG<br/>dad2::HIS1/DAD2-R92A-GFP(URA3) TUB4/TUB4-<br/>mCherry(NAT)</i> |
| ASR14<br>(CaDad2-ΔDSS,<br>Tub4-mCherry) | ASR04  | <i>Δura3::imm434/Δura3::imm434,Δhis1::hisG/Δhis1::hisG<br/>Δarg4::hisG/Δarg4::hisG, Δleu2::hisG/Δleu2::hisG<br/>dad2::HIS1/DAD2-ΔDSS-GFP(URA3) TUB4/TUB4-<br/>mCherry(NAT)</i> |
| ASR03M                                  | ASR03  | <i>Δura3::imm434/Δura3::imm434,Δhis1::hisG/Δhis1::hisG<br/>Δarg4::hisG/Δarg4::hisG, Δleu2::hisG/Δleu2::hisG<br/>dad2::HIS1/DAD2-R92A-GFP(URA3) mad2::LEU2/MAD2</i>             |
| ASR17<br>(CaDad2-R92A,<br>mad2)         | ASR03M | <i>Δura3::imm434/Δura3::imm434,Δhis1::hisG/Δhis1::hisG<br/>Δarg4::hisG/Δarg4::hisG, Δleu2::hisG/Δleu2::hisG<br/>dad2::HIS1/DAD2-R92A-GFP(URA3) mad2::LEU2/mad2::ARG4</i>       |
| ASR04M                                  | ASR04  | <i>Δura3::imm434/Δura3::imm434,Δhis1::hisG/Δhis1::hisG<br/>Δarg4::hisG/Δarg4::hisG, Δleu2::hisG/Δleu2::hisG<br/>dad2::HIS1/DAD2-ΔDSS-GFP(URA3) mad2::LEU2/MAD2</i>             |
| ASR18<br>(CaDad2-ΔDSS,<br>mad2)         | ASR04M | <i>Δura3::imm434/Δura3::imm434,Δhis1::hisG/Δhis1::hisG<br/>Δarg4::hisG/Δarg4::hisG, Δleu2::hisG/Δleu2::hisG<br/>dad2::HIS1/DAD2-ΔDSS-GFP(URA3)<br/>mad2::LEU2/mad2::ARG4</i>   |
| ASR19<br>(CaDad2-FL,<br>Ndc80-mCherry)  | ASR02  | <i>Δura3::imm434/Δura3::imm434,Δhis1::hisG/Δhis1::hisG<br/>Δarg4::hisG/Δarg4::hisG, Δleu2::hisG/Δleu2::hisG<br/>dad2::HIS1/DAD2-FL-GFP(URA3) NDC80/NDC80-mCherry-<br/>ARG4</i> |

|                                          |         |                                                                                                                                                                                  |
|------------------------------------------|---------|----------------------------------------------------------------------------------------------------------------------------------------------------------------------------------|
| ASR20<br>(CaDad2-R92A,<br>Ndc80-mCherry) | ASR03   | <i>Δura3::imm434/Δura3::imm434,Δhis1::hisG/Δhis1::hisG<br/>Δarg4::hisG/Δarg4::hisG, Δleu2::hisG/Δleu2::hisG<br/>dad2::HIS1/DAD2-R92A-GFP(URA3) NDC80/NDC80-mCherry-<br/>ARG4</i> |
| ASR21<br>(CaDad2-ΔDSS,<br>Ndc80-mCherry) | ASR04   | <i>Δura3::imm434/Δura3::imm434,Δhis1::hisG/Δhis1::hisG<br/>Δarg4::hisG/Δarg4::hisG, Δleu2::hisG/Δleu2::hisG<br/>dad2::HIS1/DAD2-ΔDSS-GFP(URA3) NDC80/NDC80-mCherry-<br/>ARG4</i> |
|                                          |         |                                                                                                                                                                                  |
| <b><i>C. neoformans strains</i></b>      |         |                                                                                                                                                                                  |
| CNV108                                   |         | <i>α H99::GFP-H4-NAT (Kozubowski et al., mBio, 2013)</i>                                                                                                                         |
| CNSD169                                  | CNVY108 | <i>α H99::GFP-H4-NAT DAD2::DAD2p-DAD2-mCherry-NEO</i>                                                                                                                            |
| CNSD170                                  | CNVY108 | <i>α H99::GFP-H4-NAT DAD2::DAD2p-DAD2-R102A-mCherry-NEO</i>                                                                                                                      |
| CNSD171                                  | CNVY108 | <i>α H99::GFP-H4-NAT DAD2::DAD2p-DAD2-ΔDSS-mCherry-NEO</i>                                                                                                                       |
| SHR741                                   |         | <i>α H99::GFP-H4-NAT, mad2::NEO (Sridhar et al., Nat. Commun., 2021)</i>                                                                                                         |

**Table S3- List of plasmids used in this study**

| <b>Plasmid</b>           | <b>Parent</b>    | <b>Description</b>                                                                                              |
|--------------------------|------------------|-----------------------------------------------------------------------------------------------------------------|
| pRS313                   |                  | <i>CEN6/ARS/HIS3 plasmid</i>                                                                                    |
| pRS313G                  | <i>pRS313</i>    | <i>GFP along with CYC1 terminator cloned into pRS313 in BamHI-ClaI sites</i>                                    |
| pSR01                    | pRS313G          | <i>ScDAD2-FL cloned in pRS313G in SacII-BamHI sites</i>                                                         |
| pSR02                    | pRS313G          | <i>ScDAD2-R126A cloned in pRS313G in SacII-BamHI sites</i>                                                      |
| pSR03                    | pRS313G          | <i>ScDAD2-R128A cloned in pRS313G in SacII-BamHI sites</i>                                                      |
| pSR04                    | pRS313G          | <i>ScDAD2-ΔDSS cloned in pRS313G in SacII-BamHI sites</i>                                                       |
| pRS316                   |                  | <i>CEN6/ARS/URA3 plasmid</i>                                                                                    |
| pSR05                    | pRS316           | <i>ScDAD2-FL with native promoter and terminator cloned in pRS316 in SacII-SacI sites</i>                       |
| pYM-N25                  |                  | <i>Plasmid used to amplify cassette to place DAD2 under GAL<sub>1-10</sub> promoter with NAT marker</i>         |
| pUG73                    |                  | <i>Plasmid to amplify DAD2 deletion cassette with LEU2 marker, also used to generate reintegration plasmids</i> |
| pSR06                    | pUG73            | <i>ScDAD2-FL cloned in SacII-SacI sites</i>                                                                     |
| pSR07                    | pUG73            | <i>ScDAD2-R126A cloned in SacII-SacI sites</i>                                                                  |
| pSR08                    | pUG73            | <i>ScDAD2-R128A cloned in SacII-SacI sites</i>                                                                  |
| pSR09                    | pUG73            | <i>ScDAD2-ΔDSS cloned in SacII-SacI sites</i>                                                                   |
| pBS-RN                   | pBS-NAT          | <i>CaRPS1 cloned in pBS NAT plasmid in NotI site</i>                                                            |
| pRN-Dad2 <sup>FL</sup>   | pBS-RN           | <i>CaDAD2pr-CaDAD2-FL-TAP cloned in Sall site</i>                                                               |
| pRN-Dad2 <sup>ΔDSS</sup> | pBS-RN           | <i>CaDAD2pr-CaDAD2-ΔDSS -TAP cloned in Sall site</i>                                                            |
| pRN-92                   | pBS-RN           | <i>CaDAD2pr-CaDAD2-R92A-TAP cloned in Sall site</i>                                                             |
| pCse4TAPLeu              |                  | <i>CSE4-TAP with LEU2 marker (Varshney and Sanyal, 2019)</i>                                                    |
| pTub4-mCherryNAT         | pDam1-mCherryNAT | <i>TUB4 ORF cloned in pDam1-mCherryNAT in SacII-SpeI sites</i>                                                  |
| pMad2-2                  |                  | <i>MAD2 deletion cassette with LEU2 (Thakur and Sanyal, 2011)</i>                                               |
| pMad2-3                  |                  | <i>MAD2 deletion cassette with ARG4 (Thakur and Sanyal, 2011)</i>                                               |
| pSR10                    | pBS-GFPUra       | <i>3'UTR of CaDAD2 cloned in pBS-GFPUra in XhoI-KpnI sites</i>                                                  |
| pSR11 (CaDad2-FL)        | pSR10            | <i>CaDAD2-FL cloned in pSR10 in SacII-SpeI sites</i>                                                            |
| pSR12 (CaDad2-R'A)       | pSR10            | <i>CaDAD2-R92A cloned in pSR10 in SacII-SpeI sites</i>                                                          |

|                                 |       |                                                                                 |
|---------------------------------|-------|---------------------------------------------------------------------------------|
| pSR15<br>(CaDad2- $\Delta$ DSS) | pSR10 | <i>CaDAD2-<math>\Delta</math>DSS</i> cloned in pSR10 in <i>SacII-SpeI</i> sites |
| pLK25                           |       | <i>Amplification of mCherry-Neomycin for C. neoformans</i>                      |

**Table S4- List of primers used in this study**

|                      |                                                                                          |                                                                                                |
|----------------------|------------------------------------------------------------------------------------------|------------------------------------------------------------------------------------------------|
| <i>S. cerevisiae</i> |                                                                                          |                                                                                                |
| ScGFP-F              | CATGGATCCATGGTGAGCAAGGGCG                                                                | Cloning GFP into pRS313                                                                        |
| ScGFP-R              | GCTGATCGATGCAAATTAAGCCTTCGAGC                                                            |                                                                                                |
| SR282                | TCCCGCGGCATTGCGGCAGGTAAAATATC                                                            | Amplification of Dad2 <sup>FL/MUT</sup> as SacII/BamHI fragment to clone into pRS313G          |
| ScDad2R              | GAGGGATCCTTCGTTACCATCTACCCTAATTCTG                                                       |                                                                                                |
| Sc126A-R             | GAGGGATCCTTCGTTACCATCTACCCTAATTGCGACCATT<br>GTTTCC                                       |                                                                                                |
| Sc128A-R             | GAGGGATCCTTCGTTACCATCTACGGCAATTCTGACCATT<br>GTTTCC                                       |                                                                                                |
| ScΔDSS-R             | GAGGGATCCTTCGTTACCATCCAAGGGTACCAGATCTTC                                                  |                                                                                                |
| ScDad2Pr F           | TGACCGCGGGTACAATGGTCCTAACTTAATG                                                          | Cloning ScDad2-FL into pRS316                                                                  |
| ScDad2R              | ATCGAGCTCCCAACACTGTAGAATACTAATATC                                                        |                                                                                                |
| ScDad2delF           | GAATATATCTAAAAAACTATTGAATAGGTTTGAAAACT<br>CATAATTCAGACAGTTATTGCTGTGAAGATCCCAGCAA<br>GG   | Deletion of genomic allele of DAD2 with <i>LEU2</i> marker                                     |
| ScDad2delR           | ATGTATATGCTATTATCGCAACTGCCTTCTCCGATTTAT<br>ATAAGATCCTTTTCTTTCTGTGCAGGCTAACCGGAACCTG<br>T |                                                                                                |
| ScDad2F              | GGTTAGAGGGCGACAATAC                                                                      | Confirmatory primers                                                                           |
| Leu2R                | CACCAGTGTCAACTCAACAAG                                                                    |                                                                                                |
| GalDad2FP            | CTAAAAAACTATTGAATAGGTTTGAAAACTCATAATTC<br>AGACAGTTATTCGACATGGAGGCCAGAATAC                | Cassette to place <i>DAD2</i> under <i>GAL</i> promoter with <i>NAT</i> marker                 |
| GalDad2RP            | GACTGAAGTTCTTTTCGCTTTATAGCAATTTGTTTCATCTA<br>TTGAATCCATTTGTACAATTCATCCATACCATGG          |                                                                                                |
| Dad2pr-SacII-F       | TGACCGCGGGTACAATGGTCCTAACTTAATG                                                          | Overlap PCR primers to amplify DAD2 <sup>FL/MUT</sup> for cloning into pUG73 for reintegration |
| Dad2pr-SacI-R        | ATCGAGCTCCCAACACTGTAGAATACTAATATC                                                        |                                                                                                |
| ScTer FP             | GATGGTAACGAATGAACAGAAAG                                                                  |                                                                                                |
| Sc126A-R             | CTTTCTGTTTCATTTCGTTACCATCTACCCTAATTGCGACCA<br>TTGTTTCC                                   |                                                                                                |
| Sc128A-R             | CTTTCTGTTTCATTTCGTTACCATCTACGGCAATTCTGACCA<br>TTGTTTCC                                   |                                                                                                |
| ScΔDSS-R             | CTTTCTGTTTCATTTCGTTACCAAGGGTACCAGATCTTC                                                  |                                                                                                |
| <i>C. albicans</i>   |                                                                                          |                                                                                                |
| RP10F                | ATAAGAATGCGGCCGCTAGATCCAACCTCAAGTAC<br>AACATGGC                                          | amplification and cloning of RPS1 locus into pBS-NAT                                           |
| RP10R                | ATAAGAATGCGGCCGCGGATCCCCAGATCATT                                                         |                                                                                                |

|                      |                                                      |                                                                                                  |
|----------------------|------------------------------------------------------|--------------------------------------------------------------------------------------------------|
|                      | TCC                                                  |                                                                                                  |
| AD02                 | ACGCGTCGACATTTTGACTAGT<br>TCTCAAATGGTTC              | Overlap PCR primers<br>to amplify<br>CaDAD2 <sup>FL/MUT</sup> and<br>clone into pBS-<br>RP10-NAT |
| AD03                 | CCATCGATCGATATCAAGCTTCAGGTTG                         |                                                                                                  |
| Dad2delR             | GTCTTGATTTTCTTCATTGATTGTCCGAAAGCCTCTTTGT<br>TATTATC  |                                                                                                  |
| Dad2delF             | GATAATAACAAAGAGGCTTTCGGACAATCAAATGAAGA<br>AAATCAAGAC |                                                                                                  |
| R92A FP              | GAACCATTAGTAGCAGTGC GTTGGACAATCA                     |                                                                                                  |
| R92A RP              | TGATTGTCCAACACGCACTGCTACTAATGGTTC                    |                                                                                                  |
| Dad2DS-F             | GGCCTCGAGGTGTACATATAATAACTCTAAATTCTGGC               |                                                                                                  |
| Dad2DS-R             | ACCGGTACCGAATTTTGTCAACCAAGAAATAGAC                   |                                                                                                  |
| Dad2FP               | TACCCGCGGATGCTGAAAACAAATACTGCTATATACC                | Amplification of<br>DAD2 ORF tagging<br>with GFP                                                 |
| Dad2GFP-RP           | CGACTAGTTTCCGTGGATTCTTCAACTTC                        |                                                                                                  |
| Dad2cFP              | TCAATACCCACCACAAAACC                                 | Confirmatory primer                                                                              |
| <i>C. neoformans</i> |                                                      |                                                                                                  |
| SD118                | TGCATGCATTCTCGTCAAAATAGGCTGC                         | Overlap PCR primers<br>to amplify<br>CnDAD2 <sup>FL/R102A</sup>                                  |
| SD119                | TCGCCGCCGTATGCTAAGGCCACGAGACAAGGGAGAGG               |                                                                                                  |
| SD120                | CCTCTCCCTTGTCTCGTGGCCTTAGCATAACGGCGGCGAA             |                                                                                                  |
| VYP152               | CTCGCCCTTGCTCACCATTTGTTGTTTTGTTTTATCAGATG<br>CG      |                                                                                                  |
| VYP153               | CTGATAAAACAAAACAACAAATGGTGAGCAAGGGCGAG               | Amplification of<br>mCherry-NEO from<br>pLK25                                                    |
| VYP154               | CTATTGGTCGTCATCAGCAGGCCAAGCTTGGTACCGAGC<br>TC        |                                                                                                  |
| VYP155               | GAGCTCGGTACCAAGCTTGGCCTGCTGATGACGACCAAT<br>AG        | amplification<br>CnDAD2 3'UTR<br>homology                                                        |
| VYP156               | CCCAAGCTTCTCCATATCGTGTCTCAATTCATCTC                  |                                                                                                  |
| VYP157               | CTTGTACAGCTCGTCCATGC                                 | Confirmatory primer                                                                              |
